# Supplementary material
Source: PubMed Central journal article supplement (PMC3242698)
Supplement: NIHMS326805-supplement-1_si_001.pdf [file NIHMS326805-supplement-1_si_001.pdf]

**Supplemental Table 1.**

| Protein            | Protein Description                                                                                                | Gene Symbol    | Average Spec-Count Control | std dev    | Average Spec-Count Tamoxifen | std dev    | GPF ttest    | Tamoxifen/Control* GPF | Pacific ttest | Pacific tamoxifen/control* |
|--------------------|--------------------------------------------------------------------------------------------------------------------|----------------|----------------------------|------------|------------------------------|------------|--------------|------------------------|---------------|----------------------------|
| IPI00645078        | Ubiquitin-activating enzyme E1                                                                                     | UBE1           | 19.5                       | 0.7        | 31.5                         | 0.7        | 0.003        | 1.6                    | 0.052         | 1.5                        |
| IPI00032140        | Serpin H1 precursor                                                                                                | SERPINH1       | 17.5                       | 0.7        | 10.5                         | 0.7        | 0.010        | 0.6                    | 0.069         | 0.7                        |
| IPI00453476        | similar to Phosphoglycerate mutase 1 (Phosphoglycerate mutase isozyme B) (PGAM-B) (BPG-dependent PGAM 1) isoform 1 | hCG_2015269    | 7.5                        | 0.7        | 13.5                         | 0.7        | 0.014        | 1.8                    | 0.504         | 1.2                        |
| <b>IPI00007188</b> | <b>ADP/ATP translocase 2</b>                                                                                       | <b>SLC25A5</b> | <b>49.0</b>                | <b>2.8</b> | <b>21.5</b>                  | <b>3.5</b> | <b>0.015</b> | <b>0.4</b>             | <b>0.028</b>  | <b>0.5</b>                 |
| IPI00017283        | Isoleucyl-tRNA synthetase, mitochondrial precursor ARS2                                                            | DDX17          | 6.5                        | 0.7        | 1.5                          | 0.7        | 0.019        | 0.2                    | 0.158         | 0.7                        |
| IPI00023785        | box polypeptide 17 isoform 1                                                                                       | DEAD           | 7.5                        | 0.7        | 2.5                          | 0.7        | 0.019        | 0.3                    | 0.493         | 0.8                        |
| IPI00007058        | Coronin-1B                                                                                                         | CORO1B         | 3.5                        | 0.7        | 7.5                          | 0.7        | 0.030        | 2.1                    | 0.273         | 1.3                        |
| IPI00006167        | Protein phosphatase 1G                                                                                             | PPM1G          | 4.5                        | 0.7        | 8.5                          | 0.7        | 0.030        | 1.9                    | 0.344         | 1.5                        |
| IPI00025039        | rRNA 2'-O-methyltransferase fibrillarin                                                                            | FBL            | 6.5                        | 0.7        | 2.5                          | 0.7        | 0.030        | 0.4                    | 0.545         | 0.8                        |
| <b>IPI00021016</b> | <b>Isoform 1 of Elongation factor Ts, mitochondrial precursor</b>                                                  | <b>TSFM</b>    | <b>11.5</b>                | <b>0.7</b> | <b>7.5</b>                   | <b>0.7</b> | <b>0.030</b> | <b>0.7</b>             | <b>0.030</b>  | <b>0.8</b>                 |
| IPI00216260        | Isoform 2 of Elongation factor Ts, mitochondrial precursor                                                         | TSFM           | 11.5                       | 0.7        | 7.5                          | 0.7        | 0.030        | 0.7                    | -             | -                          |
| IPI00479217        | Isoform Short of Heterogeneous nuclear ribonucleoprotein U                                                         | HNRPU          | 38.5                       | 0.7        | 42.5                         | 0.7        | 0.030        | 1.1                    | 0.136         | 0.8                        |
| IPI00221106        | splicing factor 3B subunit 2                                                                                       | SF3B2          | 17.5                       | 0.7        | 9.0                          | 1.4        | 0.037        | 0.5                    | 0.207         | 0.7                        |
| <b>IPI00006196</b> | <b>Isoform 2 of Nuclear mitotic apparatus protein 1</b>                                                            | <b>NUMA1</b>   | <b>21.0</b>                | <b>0.0</b> | <b>12.5</b>                  | <b>0.7</b> | <b>0.037</b> | <b>0.6</b>             | <b>0.048</b>  | <b>0.6</b>                 |
| IPI00030275        | Heat shock protein 75 kDa, mitochondrial precursor                                                                 | TRAP1          | 23.5                       | 2.1        | 8.5                          | 0.7        | 0.043        | 0.4                    | 0.122         | 0.7                        |
| IPI00015953        | Isoform 1 of Nucleolar RNA helicase 2                                                                              | DDX21          | 14.0                       | 1.4        | 6.5                          | 0.7        | 0.045        | 0.5                    | 0.085         | 0.7                        |
| IPI00027497        | Glucose-6-phosphate isomerase                                                                                      | GPI            | 14.5                       | 2.1        | 24.0                         | 1.4        | 0.045        | 1.7                    | 0.072         | 1.1                        |
| IPI00015018        | Inorganic pyrophosphatase                                                                                          | PPA1           | 1.5                        | 0.7        | 8.0                          | 0.0        | 0.049        | 5.3                    | 0.645         | 1.1                        |
| IPI00022462        | Transferrin receptor protein 1                                                                                     | TFRC           | 11.0                       | 0.0        | 4.5                          | 0.7        | 0.049        | 0.4                    | 0.158         | 0.7                        |

\*Ratio of average tamoxifen spectral counts over average spectral counts from the control sample. **BOLD** indicates agreement in ttest significance between GPF and PACIFIC acquisitions.

## Supplemental Table 2.

### A) Tamoxifen Suppressed mRNA

| Fold Change | Accession Number | Primary Sequence Name | Sequence Description                                               |
|-------------|------------------|-----------------------|--------------------------------------------------------------------|
| -44.5       | AU148391         | -                     | CDNA FLJ12532 fis, clone NT2RM4000200                              |
| -38.6       | AL589603         | SYNPO2                | synaptopodin 2                                                     |
| -31.5       | AC003989         | -                     | -                                                                  |
| -27.9       | AA923354         | MAOA                  | monamine oxidase A                                                 |
| -27.1       | AB018195         | CA11                  | carbonic anhydrase XI                                              |
| -25.6       | AL822160         | LOC286058             | hypothetical protein LOC286058                                     |
| -20.7       | AL688418         | PLXNA2                | plexin A2                                                          |
| -20.5       | BC043409         | KCNH5                 | potassium voltage-gated channel, subfamily H (eag-related)         |
| -17.1       | NM_004621        | TRPC6                 | transient receptor potential cation channel, subfamily C, member 6 |
| -16.1       | NM_001374        | DNASE1L2              | deoxyribonuclease I-like 2                                         |
| -16         | BE222220         | LEMD1                 | LEM domain containing 1                                            |
| -16         | BC030743         | -                     | CDNA clone IMAGE:4793232                                           |
| -15.9       | AJ271068         | TRPC6                 | transient receptor potential cation channel, subfamily C, member 6 |
| -15.8       | BF439270         | -                     | transcribed locus                                                  |
| -15.7       | AF123462         | NRXN3                 | neuexin 3                                                          |
| -15.5       | A423201          | BMPER                 | BMP binding endothelial regulator                                  |
| -15.3       | AB093548         | SCN1A                 | sodium channel, voltage-gated receptor 4                           |
| -14.2       | AF202063         | FGFR4                 | fibroblast growth factor receptor 4                                |
| -14.1       | BF791698         | -                     | -                                                                  |
| -14         | BC036312         | -                     | CDNA clone IMAGE:4837142                                           |

### B) Tamoxifen induced mRNA

| Fold Change | Accession Number | Primary Sequence Name | Sequence Description                                                              |
|-------------|------------------|-----------------------|-----------------------------------------------------------------------------------|
| 48.1        | NM_002274        | KRT13                 | keratin 13                                                                        |
| 35.8        | NM_001585        | MPPED1                | metallophosphoesterase domain containing 1                                        |
| 18.5        | NM015831         | ACHE                  | acetylcholinesterase (Yt blood group)                                             |
| 17.7        | AI377007         | MPPED1                | metallophosphoesterase domain containing 1                                        |
| 14.7        | M57399           | PTN                   | pleiotrophin (heparin binding growth factor 8, neurite growth-promoting factor 1) |
| 13.9        | NM_024522        | NKAIN1                | Na <sup>+</sup> /K <sup>+</sup> transporting ATPase interacting 1                 |
| 13.8        | X98405           | MAG                   | myelin associated glycoprotein                                                    |
| 13.2        | BC042133         | LOC339766             | hypothetical protein LOC339766                                                    |
| 13.2        | NM_133329        | KCNGB3                | potassium voltage-gated channel, subfamily G, member 3                            |
| 12.6        | AB028989         | MAPK8IP3              | mitogen-activated protein kinase 8 interacting protein 3                          |
| 11.9        | NM_002783        | PSG7                  | pregnancy specific beta-1-glycoprotein 7                                          |
| 11.5        | X52585           | CD22                  | CD22 molecule                                                                     |
| 10.4        | AB037780         | MUC20                 | mucin 20, cell surface associated                                                 |
| 10.3        | NM_006398        | UBD                   | ubiquitin D                                                                       |
| 10.1        | NM_000792        | DIO1                  | deiodinase, iodothyronine, type I                                                 |
| 10          | X97671           | EPOR                  | erythropoietin receptor                                                           |
| 9.8         | BC020775         | -                     | Homo sapiens, clone IMAGE:4248008, mRNA                                           |
| 9.8         | M34421           | PSG9                  | pregnancy specific beta-1-glycoprotein 9                                          |
| 9.7         | AL524520         | LGR5                  | leucine-rich repeat-containing G protein-coupled receptor 5                       |
| 9.2         | AW977708         | -                     | transcribed locus                                                                 |
